# Supplementary material for: Comparison of quadriceps and hamstring muscle strength after exercises with and without blood flow restriction in the postoperative period of the anterior cruciate ligament: a randomized controlled trial.
Source: Research Square preprint supplement (doi:10.21203/rs.3.rs-956582/v1), 2021-10-19
Supplement: Supplementary file 1 [file 96e0a23159031c2f1ae602f3.docx]

**Table 1. Characterization of the sample according to group**

|  | Control Group (n=12) | Intervention Group (n=12) |  |
| --- | --- | --- | --- |
|  | Mean SD | Mean SD | p-value |
|  |  |  |  |
| Age (years) | 39,66 10,78 | 41,16 9,8 | 0,401 |
| Weight (kg) | 68,66 10,43 | 73,16 13,89 | 0,432 |
| Height (cm)  BMI (kg/m(g²)  Female  Male | 170,25 6,21  23,60 2,39  3 (25,00%)  9 (75,00%) | 173,08 7,64  24,25 3,05  4 (33,33%)  8 (66,67%) | 0,762  0,694 |

SD: standard deviation; BMI: Body mass index
